# Supplementary material
Source: PubMed Central journal article supplement (PMC8519606)
Supplement: NIHMS1740187-supplement-Supplementary_Figure_S2.pdf [file NIHMS1740187-supplement-Supplementary_Figure_S2.pdf]

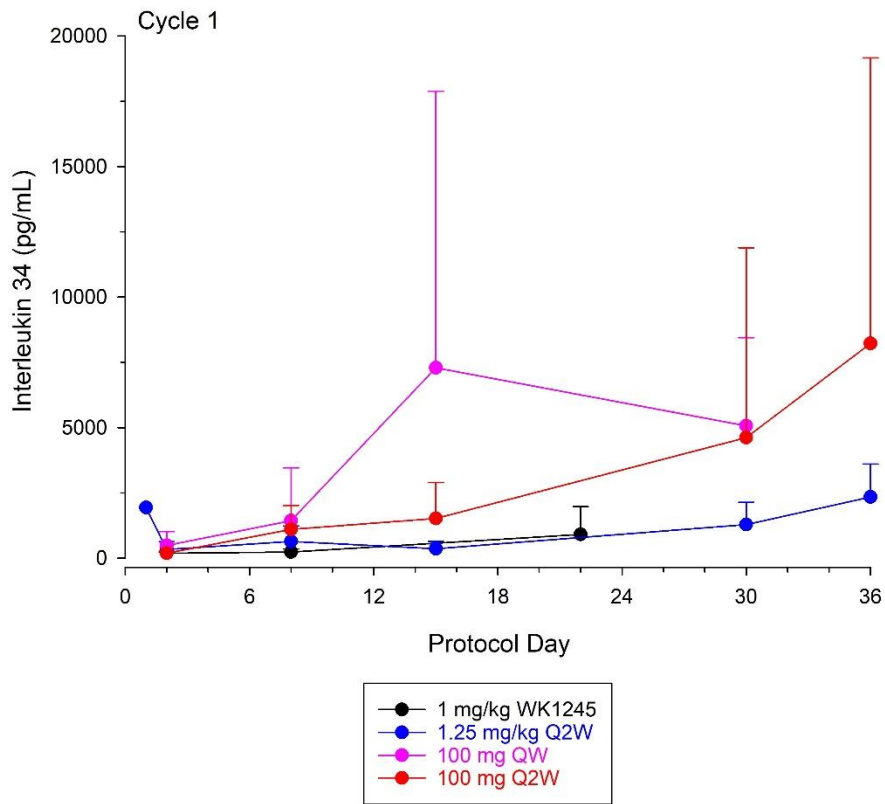

**Supplementary Figure S2.** Time plots of circulating levels of interleukin-34

Abbreviations: QW, every week; Q2W, every two weeks; WK1245, weeks 1, 2, 4, and 5.
