# Supplementary material
Source: PubMed Central journal article supplement (PMC8519606)
Supplement: NIHMS1740187-supplement-Supplementary_Figure_S3.pdf [file NIHMS1740187-supplement-Supplementary_Figure_S3.pdf]

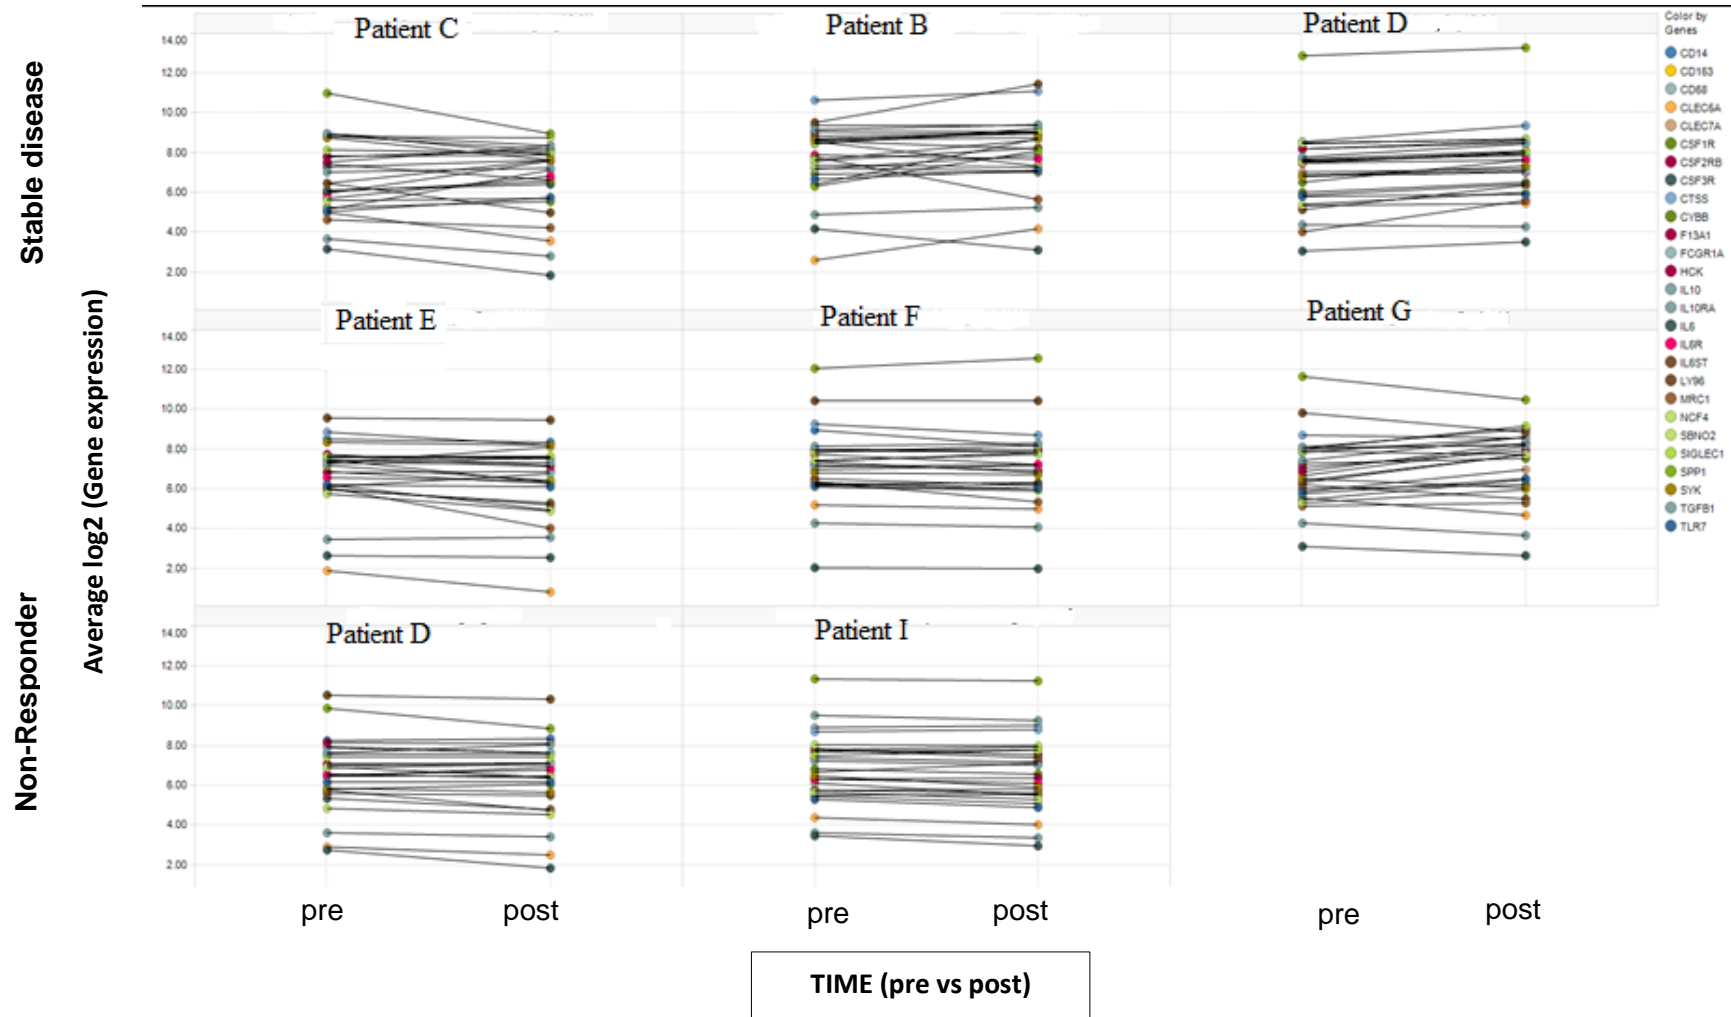

**Supplementary Figure S3.** Assessment of tumor associated macrophage depletion using macrophage gene signature. The downward trend (pre vs post, indicating depletion of TAMs) of the gene signature did not appear pronounced in any of the patient samples except for patient C.
