# Supplementary material
Source: PubMed Central journal article supplement (PMC8519606)
Supplement: NIHMS1740187-supplement-Supplementary_Table_S1.pdf [file NIHMS1740187-supplement-Supplementary_Table_S1.pdf]

**Supplementary Table S1:** Best overall response by RECIST 1.1 and PCWG2 for bone

|                                 | MBC (N = 22)               |                            |                        |                       | mCRPC (N = 12)             |                            |
|---------------------------------|----------------------------|----------------------------|------------------------|-----------------------|----------------------------|----------------------------|
|                                 | 1.25 mg/kg<br>Q2W<br>n = 6 | 1 mg/kg<br>WK1245<br>n = 5 | 100 mg<br>Q2W<br>n = 5 | 100 mg<br>QW<br>n = 6 | 1.25 mg/kg<br>Q2W<br>n = 8 | 1 mg/kg<br>WK1245<br>n = 4 |
| Data are n (%)                  |                            |                            |                        |                       |                            |                            |
| <b>Best response by RECIST</b>  |                            |                            |                        |                       |                            |                            |
| Complete response               | 0                          | 0                          | 0                      | 0                     | 0                          | 0                          |
| Partial response                | 0                          | 0                          | 0                      | 0                     | 0                          | 0                          |
| Stable disease                  | 3 (50)                     | 0                          | 1 (20)                 | 1 (17)                | 3 (38)                     | 0                          |
| Progressive disease             | 2 (33)                     | 5 (100)                    | 4 (80)                 | 5 (83)                | 1 (13)                     | 3 (75)                     |
| Not evaluable <sup>a</sup>      | 1 (17)                     | 0                          | 0                      | 0                     | 4 (50)                     | 1 (25)                     |
| Overall response rate (CR/PR)   | 0                          | 0                          | 0                      | 0                     | 0                          | 0                          |
| Disease control rate (CR/PR/SD) | 3 (50)                     | 0                          | 1 (20)                 | 1 (17)                | 3 (38)                     | 0                          |
| <b>Best response by PCWG2</b>   |                            |                            |                        |                       |                            |                            |
| Stable disease                  | -                          | -                          | -                      | -                     | 2 (25)                     | 2 (50)                     |
| Progressive disease             | -                          | -                          | -                      | -                     | 4 (50)                     | 1 (25)                     |
| Not evaluable                   | -                          | -                          | -                      | -                     | 2 (25)                     | 1 (25)                     |

Data cutoff date: 10 May 2018.

A response (CR or PR) required confirmation  $\geq 4$  weeks after initial response.

Assignment of SD required 7 weeks (49 days) elapsed between first dose and disease assessment.

<sup>a</sup>Patients without a valid response assessment  $\geq 7$  weeks after enrollment that had not already progressed were assigned a best response of Not Evaluable.

Abbreviations: CR, complete response; MBC, metastatic breast cancer; mCRPC, metastatic castration-resistant prostate cancer; PCWG2, Prostate Cancer Clinical Trials Working Group; PD, progressive disease; PR, partial response; SD, stable disease; QW, every week; Q2W, every two weeks; WK1245, weeks 1, 2, 4, and 5.
