# Supplementary material
Source: PubMed Central journal article supplement (PMC8519606)
Supplement: NIHMS1740187-supplement-Supplementary_Table_S2.pdf [file NIHMS1740187-supplement-Supplementary_Table_S2.pdf]

**Supplementary Table S2:** Summary of noncompartmental pharmacokinetic parameters following intravenous infusion of LY3022855

| Dose Regimen<br>Cycle<br>Day<br>N              | Geometric Mean (CV%)               |                           |                             |                                 |                |                           |
|------------------------------------------------|------------------------------------|---------------------------|-----------------------------|---------------------------------|----------------|---------------------------|
|                                                | 1 mg/kg<br>WK1245                  | 1.25 mg/kg<br>Q2W         |                             | 100 mg<br>Q2W                   |                | 100 mg<br>QW              |
|                                                | 1                                  | 1                         | 29                          | 1                               | 29             | 1                         |
| C <sub>168h</sub><br>(µg/mL)                   | 2.87 <sup>a</sup><br>(73)          | 3.92 <sup>b</sup><br>(60) | 2.92 <sup>c</sup><br>(52)   | (5.09,<br>10.8) <sup>d</sup>    | (20.5, 2.46)   | 6.29 <sup>e</sup><br>(22) |
| C <sub>max</sub><br>(µg/mL)                    | 19.3<br>(12)                       | 25.1<br>(13)              | 19.0<br>(16)                | 28.6<br>(26)                    | (34.3, 19.6)   | 30.9<br>(14)              |
| t <sub>max</sub> <sup>f</sup><br>(h)           | 1.10<br>(0.98 – 21.00)             | 2.29<br>(1.00 – 21.83)    | 21.86<br>(19.80 – 26.10)    | 2.38<br>(1.00 – 26.40)          | (22.37, 22.33) | 1.05<br>(1.02 – 1.08)     |
| t <sub>1/2</sub> <sup>g</sup><br>(h)           | 44.2 <sup>e</sup><br>(33.0 – 92.5) | 63.4<br>(39.1 - 101)      | 83.2<br>(48.4 – 177)        | 114 <sup>a</sup><br>(104 - 136) | NC             | 71.5<br>(38.4 – 90.0)     |
| C <sub>av,τ</sub><br>(µg/mL)                   | 6.12 <sup>e</sup><br>(38)          | 5.81<br>(35)              | 6.72<br>(61)                | 12.8 <sup>a</sup><br>(14)       | NC             | 14.0<br>(31)              |
| AUC <sub>(0-∞)</sub><br>(h·µg/mL)              | 1140 <sup>e</sup><br>(53)          | 2010<br>(40)              | 2560<br>(80)                | 5000 <sup>a</sup><br>(9)        | NC             | 2990<br>(41)              |
| AUC <sub>(0-τ)</sub> <sup>h</sup><br>(h·µg/mL) | 1030 <sup>e</sup><br>(38)          | 1950<br>(35)              | 2260<br>(61)                | 4310 <sup>a</sup><br>(14)       | NC             | 2350<br>(31)              |
| CL<br>(L/h)                                    | 0.0704 <sup>e</sup><br>(27)        | 0.0493<br>(45)            | 0.0388<br>(77)              | 0.0232 <sup>a</sup><br>(14)     | NC             | 0.0425<br>(31)            |
| V <sub>ss</sub><br>(L)                         | 4.50 <sup>e</sup><br>(30)          | 4.28<br>(21)              | 5.23<br>(30)                | 3.91 <sup>a</sup><br>(34)       | NC             | 4.41<br>(16)              |
| R <sub>A</sub>                                 | NC                                 | NC                        | 1.04 <sup>i,j</sup><br>(35) | NC                              | NC             | NC                        |

Abbreviations: AUC<sub>(0-τ)</sub>, area under the concentration versus time curve from time zero to τ; AUC<sub>(0-∞)</sub>, area under the concentration versus time curve from time zero to ∞; C<sub>168h</sub>, serum concentration collected 168 hours following the start of infusion; C<sub>av,τ</sub>, average serum concentration over dosing interval calculated using AUC<sub>(0-τ)</sub>; CL, total body clearance; C<sub>max</sub>, maximum serum concentration; CV, coefficient of variation; h, hours; N, number of patients; NC, not calculable; Q2W, once every 2 weeks; QW, once weekly; RA, intrapatient accumulation ratio; t<sub>1/2</sub>, terminal elimination half-life; t<sub>max</sub>, time of maximum serum concentration; V<sub>ss</sub>, volume of distribution at steady state.

<sup>a</sup>N = 3 patients; <sup>b</sup>N = 7 patients; <sup>c</sup>N = 4 patients; <sup>d</sup>N = 2 patients; reported as individual values; <sup>e</sup>N = 5 patients; <sup>f</sup>Median (Minimum, Maximum); <sup>g</sup>Geometric Mean (Minimum, Maximum); <sup>h</sup>τ = 168 h for WK1245 (data only available through Week 1) and QW regimens; τ = 336 h for Q2W regimen; <sup>i</sup>RA = AUC(0-τ),day 29/ AUC(0-τ),day 1; <sup>j</sup>N = 8 patients
