# Supplementary material
Source: PubMed Central journal article supplement (PMC8519606)
Supplement: NIHMS1740187-supplement-Supplementary_Table_S3.pdf [file NIHMS1740187-supplement-Supplementary_Table_S3.pdf]

**Supplementary Table S3:** Summary of changes in immune cell subsets from baseline to Cycle 1 Day 8 after LY3022855 treatment

|                 | MBC Patients |                                                          | mCRPC Patients |                                                          |
|-----------------|--------------|----------------------------------------------------------|----------------|----------------------------------------------------------|
|                 | <i>n</i>     | Percentage change from baseline to Day 8<br>Median (IQR) | <i>n</i>       | Percentage change from baseline to Day 8<br>Median (IQR) |
| C14+HLA-DR      | 12           | -10 (-28 to -5)                                          | 10             | -12 (-20 to -4)                                          |
| Live cell count | 18           | -10 (-22 to 3)                                           | 11             | -3 (-7 to 3)                                             |
| CD3 count       | 18           | -9 (-27 to 17)                                           | 11             | 9 (-8 to 18)                                             |
| CD3 live cells  | 18           | 5 (-6 to 30)                                             | 11             | 3 (-11 to 15)                                            |
| CD4+CD3         | 18           | 1 (-5 to 8)                                              | 11             | 0.5 (-1 to 4)                                            |
| CD4 count       | 18           | -5 (-31 to 14)                                           | 11             | 7 (-3 to 16)                                             |
| CD8+CD3         | 18           | -0.2 (-9 to 18)                                          | 11             | -3 (-12 to 5)                                            |
| CD8/CD4 ratio   | 18           | -1 (-14 to 28)                                           | 11             | -4 (-15 to 6)                                            |
| CD8 count       | 18           | -6 (-16 to 19)                                           | 11             | 12 (-13 to 22)                                           |
| CD8/FOXP3 ratio | 18           | 3 (-16 to 31)                                            | 11             | -1 (-14 to 13)                                           |
| CTLA4+CD4       | 18           | -5 (-23 to 24)                                           | 11             | 21 (1 to 42)                                             |
| TLA4+CD8        | 18           | -16 (-29 to 36)                                          | 11             | 3 (-8 to 50)                                             |
| FOXP3+CD4       | 18           | -6 (-25 to 23)                                           | 11             | 9 (-13 to 17)                                            |
| FOXP3+CD8       | 18           | -3 (-49 to 17)                                           | 11             | 23 (11 to 61)                                            |
| FOXP3 count     | 18           | -7 (-41 to 29)                                           | 11             | -0.1 (-13 to 24)                                         |
| ICOS+CD4        | 18           | -4 (-13 to 13)                                           | 11             | 22 (-3 to 47)                                            |
| ICOS+CD8        | 18           | -2 (-33 to 22)                                           | 11             | -22 (-27 to 18)                                          |
| KI67+CD4        | 18           | -19 (-40 to 42)                                          | 11             | 1 (-16 to 81)                                            |
| KI67+CD8        | 18           | -6 (-48 to 31)                                           | 11             | -4 (-22 to 66)                                           |
| LAG3+CD4        | 18           | 17 (-23 to 84)                                           | 11             | 23 (12 to 59)                                            |
| LAG3+CD8        | 18           | 27 (-20 to 84)                                           | 11             | 13 (-8 to 74)                                            |
| PD1+CD4         | 18           | 5 (-10 to 16)                                            | 11             | -9 (-23 to 19)                                           |
| PD1+CD8         | 18           | -8 (-16 to 21)                                           | 11             | -8 (-21 to 23)                                           |
| TIM3+CD4        | 18           | -30 (-36 to -9)                                          | 11             | -17 (-21 to -5)                                          |
| TIM3+CD8        | 18           | -3 (-12 to 18)                                           | 11             | -17 (-31 to 19)                                          |

Abbreviations: IQR, inter-quartile range; MBC, metastatic breast cancer; mCRPC, metastatic castration-resistant prostate cancer; *n*, participants with blood immune cell subset analyzed by flow cytometry.
