# Supplementary material
Source: PubMed Central journal article supplement (PMC8519606)
Supplement: NIHMS1740187-supplement-Supplementary_Table_S4.pdf [file NIHMS1740187-supplement-Supplementary_Table_S4.pdf]

**Supplementary Table S4:** Relationship between confounding factors and response (RECIST)

| Potential Confounders | Levels    | MBC                              |                              | mCRPC                            |                              | Total                            |                              |
|-----------------------|-----------|----------------------------------|------------------------------|----------------------------------|------------------------------|----------------------------------|------------------------------|
|                       |           | PD ( <i>n</i> ), SD ( <i>n</i> ) | <i>P</i> -value <sup>a</sup> | PD ( <i>n</i> ), SD ( <i>n</i> ) | <i>P</i> -value <sup>a</sup> | PD ( <i>n</i> ), SD ( <i>n</i> ) | <i>P</i> -value <sup>a</sup> |
| Dose level            | 1 mg/kg   | 5, 0                             | 0.149                        | 3, 0                             | 0.143                        | 8, 0                             | 0.006                        |
|                       | 1.25mg/kg | 2, 3                             |                              | 1, 3                             |                              | 3, 6                             |                              |
|                       | 100 mg    | 9, 2                             |                              | 0, 0                             |                              | 9, 2                             |                              |
| Age                   | <65       | 12, 4                            | 1                            | 1, 2                             | 0.486                        | 13, 6                            | 1                            |
|                       | ≥65       | 4, 1                             |                              | 3, 1                             |                              | 7, 2                             |                              |
| Gender                | Female    | 15, 4                            | 0.429                        | 0, 0                             | 1                            | 15, 4                            | 0.371                        |
|                       | Male      | 1, 1                             |                              | 4, 3                             |                              | 5, 4                             |                              |
| Site                  | 101       | 11, 5                            | 0.278                        | 4, 3                             | 1                            | 15, 8                            | 0.281                        |
|                       | 102       | 5, 0                             |                              | 0, 0                             |                              | 5, 0                             |                              |

<sup>a</sup>Fisher exactAbbreviations: MBC, metastatic breast cancer; mCRPC, metastatic castration-resistant prostate cancer; *n*, number of evaluable samples; PD, progressive disease; SD, stable disease.
